# Supplementary material
Source: HighWire-hosted journal article supplement (https://bmjopen.bmj.com/content/15/2/e086874)
Supplement: inline-supplementary-material-1 [file inline-supplementary-material-1.pdf]

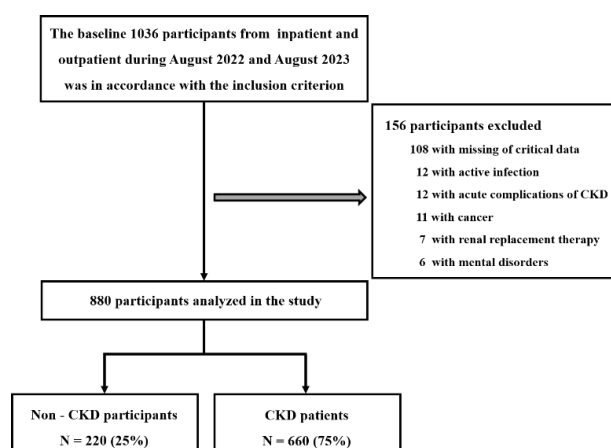

Supplementary data Figure 1. Flowchart of participant selection.

In the 1036 inpatient and outpatient participants, 880 were eligible for inclusion. Based on the exclusion criterion, participants were excluded because of missing critical data (n=108), active infection (n=12), acute complications of CKD (n=12), cancer (n=11), renal replacement therapy (n=7), and mental disorders (n=6). CKD: chronic kidney disease.
