# Supplementary material
Source: HighWire-hosted journal article supplement (https://bmjopen.bmj.com/content/15/2/e086874)
Supplement: inline-supplementary-material-2 [file inline-supplementary-material-2.pdf]

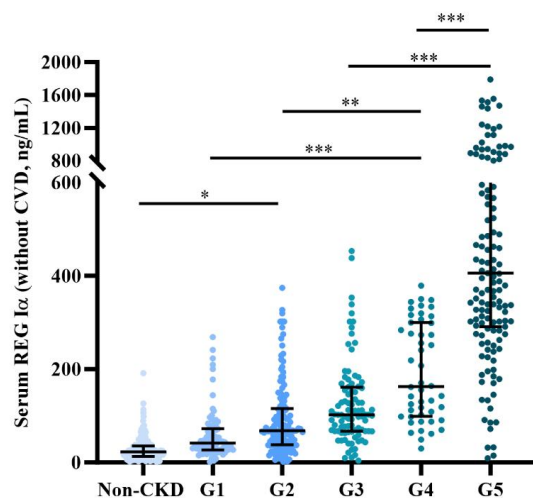

A

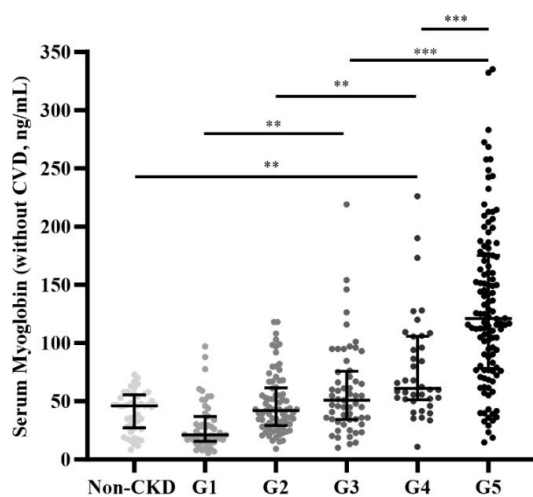

B

Supplementary data Figure 2. Distribution of serum REG Iα and Myoglobin in non-CKD and different CKD groups, which participants without CVD.

A: Distribution of serum REG Iα. The serum REG Iα level of non-CKD group was significantly lower than that of G2, G3, G4, and G5 groups individually. B: Distribution of serum myoglobin. The serum myoglobin level of non-CKD was significantly lower than that of G4 and G5 groups individually. \*:  $P < 0.050$ , \*\*:  $P < 0.010$ , \*\*\*:  $P < 0.001$ . Tukey's multiple comparison tests were conducted to examine the differences in different groups. CKD: chronic kidney disease, CVD: cardiovascular

disease, REG Ia: regenerating protein Ia.
